# Supplementary material for: Incorporating Desirable Difficulties into the design of digital learning: A think-aloud study
Source: Research Square preprint supplement (doi:10.21203/rs.3.rs-7421926/v1), 2025-10-17
Supplement: Supplementary file 1 [file 5d408770c93facb0bd8166ce.docx]

**Additional file 2**

**Codebook**

| P1 | Productive  – identify gaps in knowledge, manage to get to the right answer or understanding | Clearly Defined Learning Objectives  – students know what they need to do or understand |
| --- | --- | --- |
| P2 | Appropriate Task Difficulty  – students are capable of completing the task |
| P3 | Effective feedback  – students receive appropriate feedback to fill in the gaps in their knowledge or understanding   - Students are clear on what are the important gaps in their learning e.g through testing |
| P4 | Clear instructions and organized materials  – learning materials are well-structured to minimize extraneous cognitive load |
| U1 | Unproductive  – cannot proceed to next step, do not understand answer when provided | Clearly Defined Learning Objectives  – students do not know what they need to do or understand |
| U2 | Inappropriate Task Difficulty  – students are incapable of completing the task – either too easy or too difficult |
| U3 | Effective feedback  – students lack appropriate feedback to fill in the gaps in their knowledge or understanding   - Students are unclear of what are the important gaps in their knowledge |
| U4 | Clear instructions and organized materials  – learning materials are not well-structured to minimize extraneous cognitive load |
