# Supplementary material for: Incorporating Desirable Difficulties into the design of digital learning: A think-aloud study
Source: Research Square preprint supplement (doi:10.21203/rs.3.rs-7421926/v1), 2025-10-17
Supplement: Supplementary file 2 [file 8fe78864f937df30659edb36.docx]

**Additional file 1**

**Interview Guide:**

Question 1: Do you feel that the science practicals are useful in preparing you for your practice as a doctor in the future? Why or why not?

Question 2: Which science practical did you learn the most from?

Question 3: How do you prepare for science practical sessions? Do you read the materials provided by the school? Why or why not?

**Think-aloud segment:**

Instruction to participants: Read through the science practical guide. Along the way, verbalise what you are thinking at each point.

Question 4: How can the school improve the preparatory materials for science practical?
